# Supplementary material for: Polaron formation and transport in Bi2WO6 studied by DFT+U and hybrid PBE0 functional approaches
Source: Royal Society of Chemistry journal article supplement (doi:10.1039/d2cp02987a), 2022-01-01
Supplement: d2cp02987a1.pdf [file d2cp02987a1.pdf]

## Supporting Information

### Polarons formation and transport in $\text{Bi}_2\text{WO}_6$ studied by DFT+U and hybrid functional approaches

Junyan Tao, Qingyan Zhang, and Taifeng Liu\*

National & Local Joint Engineering Research Center for Applied Technology of  
Hybrid Nanomaterials, Henan University, Kaifeng, 475004, China.

E-mail: T. Liu: [tfliu@vip.henu.edu.cn](mailto:tfliu@vip.henu.edu.cn)

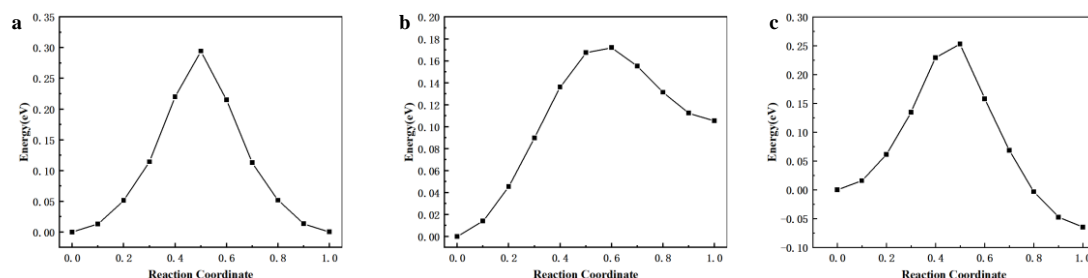

**Fig. S1** (a) The energy curves for the hole polaron transfer from O<sub>3</sub> to O<sub>5</sub> site. (b) The energy curves for the hole polaron transfer from O<sub>4</sub> to O<sub>2</sub> site. (c) The energy curves for the hole polaron transfer from O<sub>2</sub> to O<sub>5</sub> site.

**Table S1.** The magnetization of each intermediate in the transfer along path calculated by DFT+U approach

| Single point | $m_{O_3}:m_{O_5}/m_{O_{tot}}$ | $m_{O_4}:m_{O_2}/m_{O_{tot}}$ | $m_{O_2}:m_{O_5}/m_{O_{tot}}$ |
|--------------|-------------------------------|-------------------------------|-------------------------------|
| 0            | 0.002:0.696/0.848             | 0.087:0.705/0.898             | 0.000:0.696/0.848             |
| 0.1          | 0.002:0.684/0.850             | 0.116:0.691/0.913             | 0.000:0.682/0.850             |
| 0.2          | 0.004:0.670/0.882             | 0.158:0.672/0.934             | 0.000:0.666/0.853             |
| 0.3          | 0.005:0.651/0.856             | 0.221:0.641/0.961             | 0.000:0.643/0.856             |
| 0.4          | 0.018:0.544/0.849             | 0.314:0.590/0.990             | 0.006:0.598/0.860             |
| 0.5          | 0.190:0.301/0.873             | 0.430:0.503/1.010             | 0.160:0.468/0.959             |
| 0.6          | 0.558:0.020/0.851             | 0.533:0.391/1.021             | 0.603:0.062/0.948             |
| 0.7          | 0.649:0.019/0.857             | 0.604:0.284/1.004             | 0.652:0.033/0.930             |
| 0.8          | 0.670:0.013/0.854             | 0.646:0.207/0.982             | 0.673:0.023/0.918             |
| 0.9          | 0.684:0.009/0.851             | 0.672:0.154/0.963             | 0.691:0.017/0.907             |
| 1.0          | 0.696:0.006/0.848             | 0.691:0.118/0.950             | 0.705:0.012/0.898             |

$m_{O_2}, m_{O_3}, m_{O_4}, m_{O_5}$  are the magnetization on the O<sub>2</sub>, O<sub>3</sub>, O<sub>4</sub>, O<sub>5</sub> site.  $m_{O_{tot}}$  is the total magnetization on O sites. For the transfer from O<sub>3</sub> site to O<sub>5</sub> site, O<sub>4</sub> site to O<sub>2</sub> site, and O<sub>2</sub> site to O<sub>5</sub>, the hole polaron transfer distance is 2.807 Å, 2.787 Å and 3.171 Å, the activation energy  $\Delta G^*$  is 0.294 eV, 0.172 eV and 0.253 eV, the calculated mobility is  $1.58 \times 10^{-6} \text{ cm}^2\text{V}^{-1}\text{s}^{-1}$ ,  $1.83 \times 10^{-4} \text{ cm}^2\text{V}^{-1}\text{s}^{-1}$ , and  $1.00 \times 10^{-5} \text{ cm}^2\text{V}^{-1}\text{s}^{-1}$ .
